# Supplementary material
Source: Springer Nature journal article supplement (https://www.springermedizin.de/resource/supplementary/12888_2014_1639_MOESM2_ESM.pdf/9481028)

**AVERAGE (IDSCORE) BY LC SP FUNCTION**

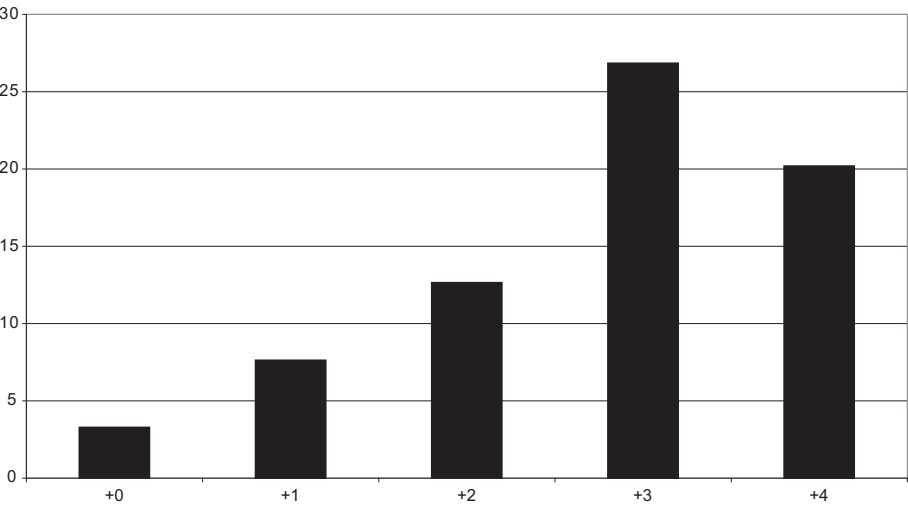

Supplement: MOESM2 [file 9481028]
